# Supplementary figures and images for: Vascular Niche Facilitates Acquired Drug Resistance to c-Met Inhibitor in Originally Sensitive Osteosarcoma Cells
Source: MDPI journal article supplement (doi:10.3390/cancers14246201), 2022-12-15

Figure 1 (c)

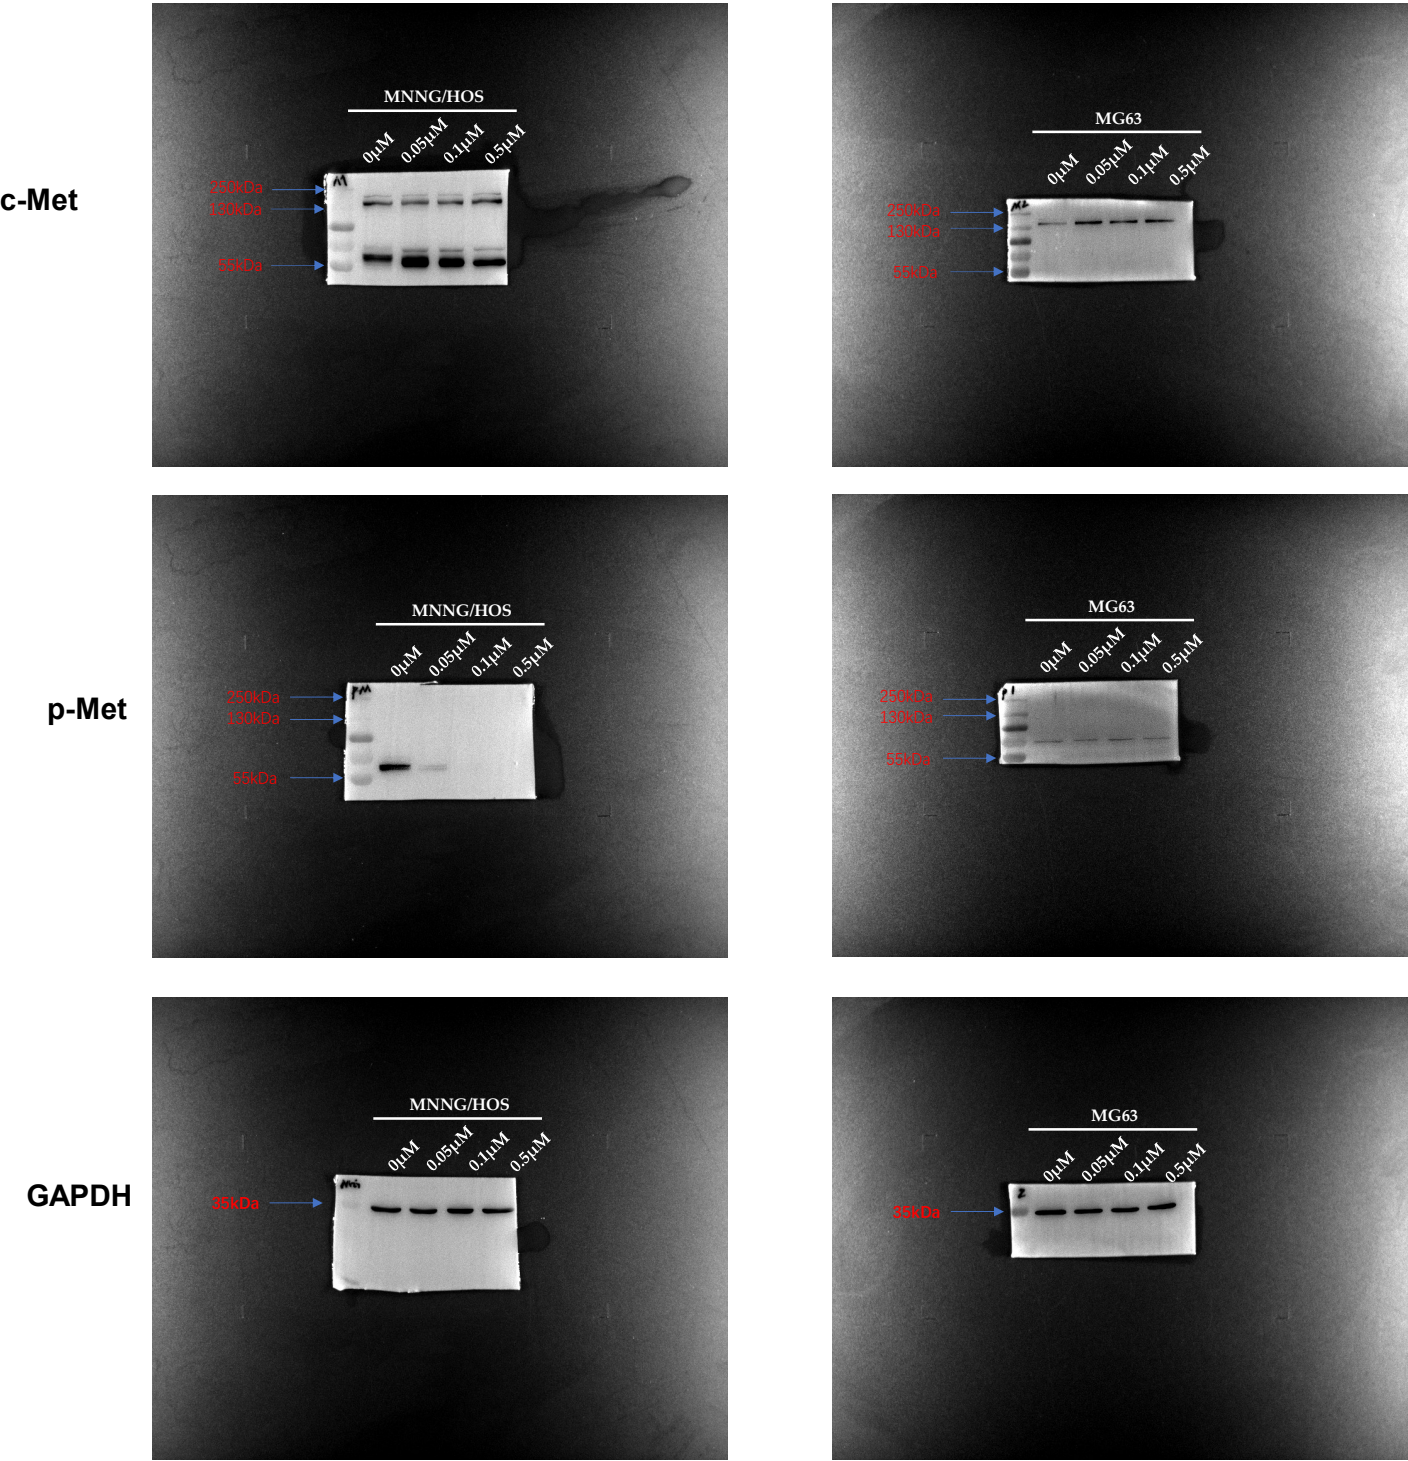

Figure 2 (b)

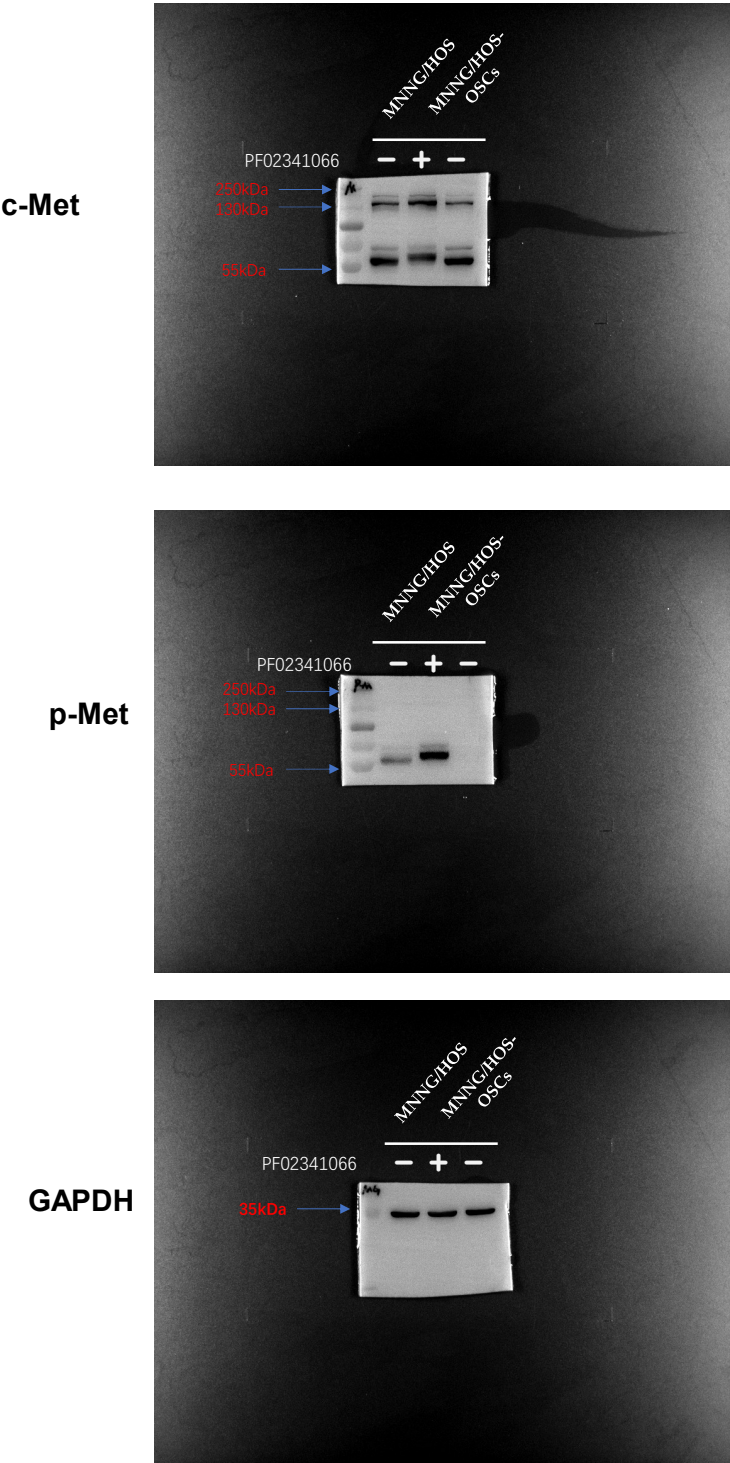

Figure 5 (c)

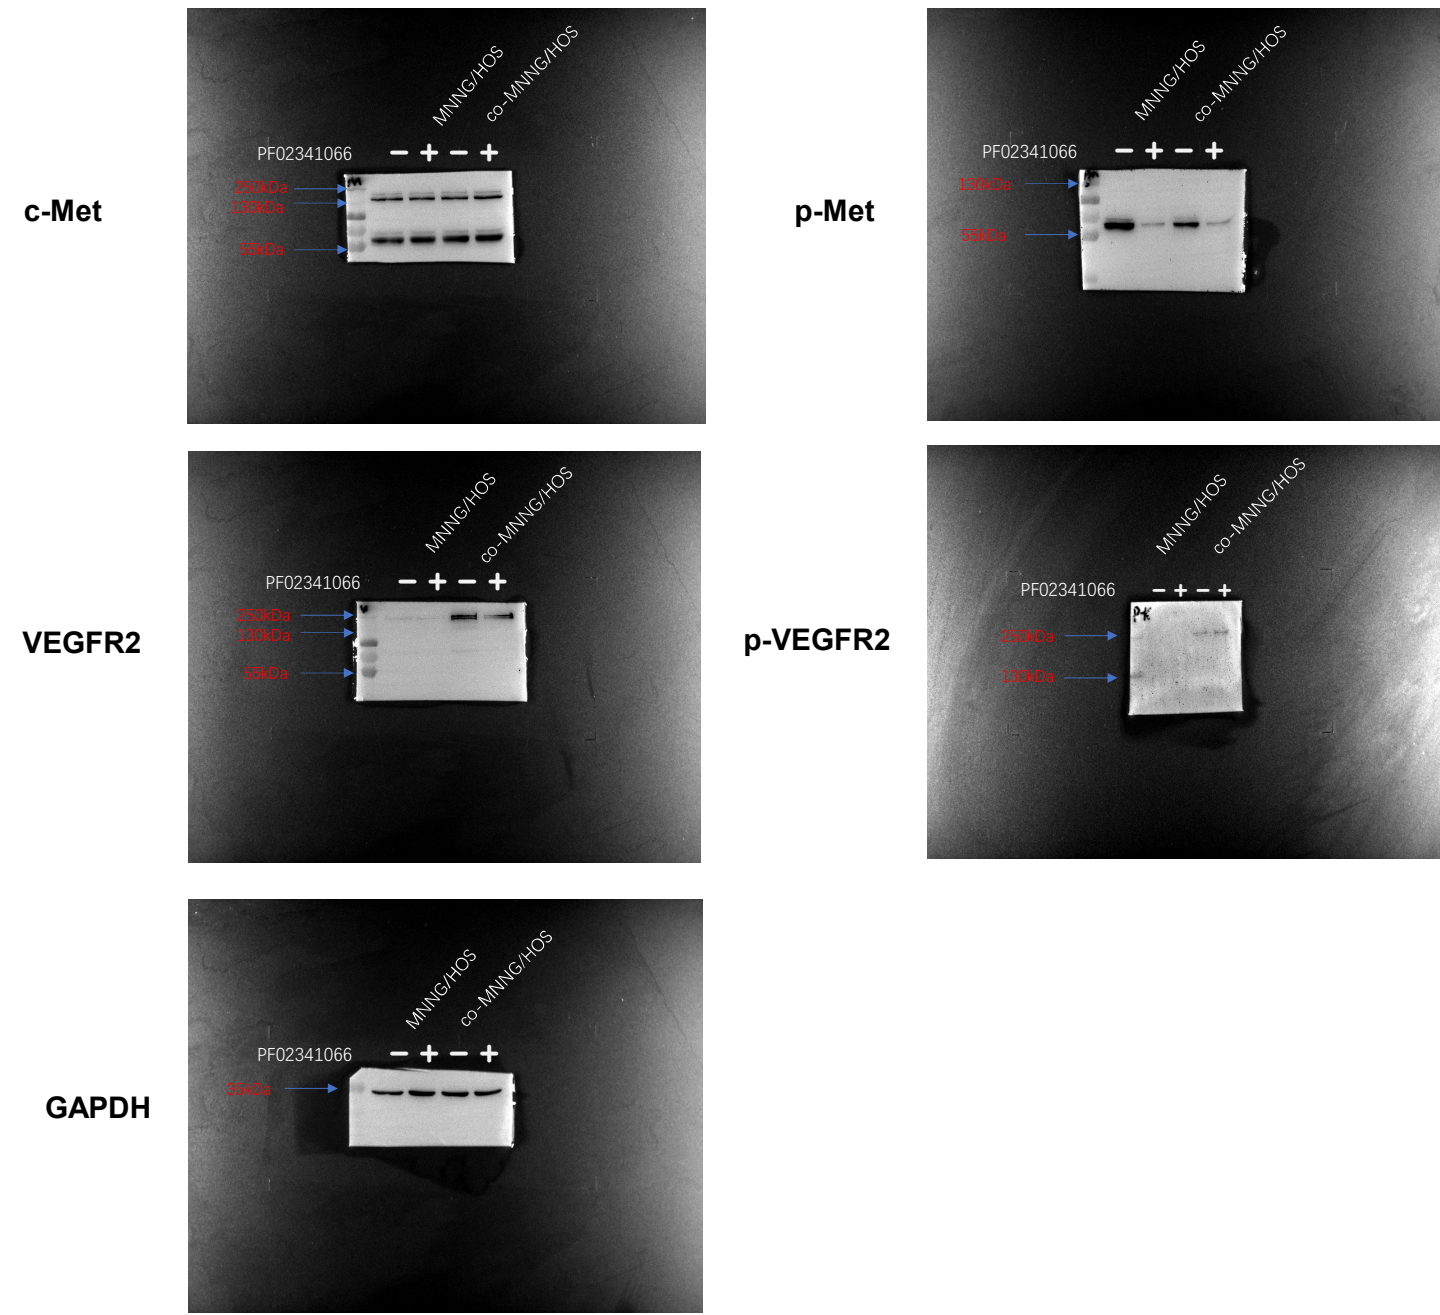

Figure 5 (g)

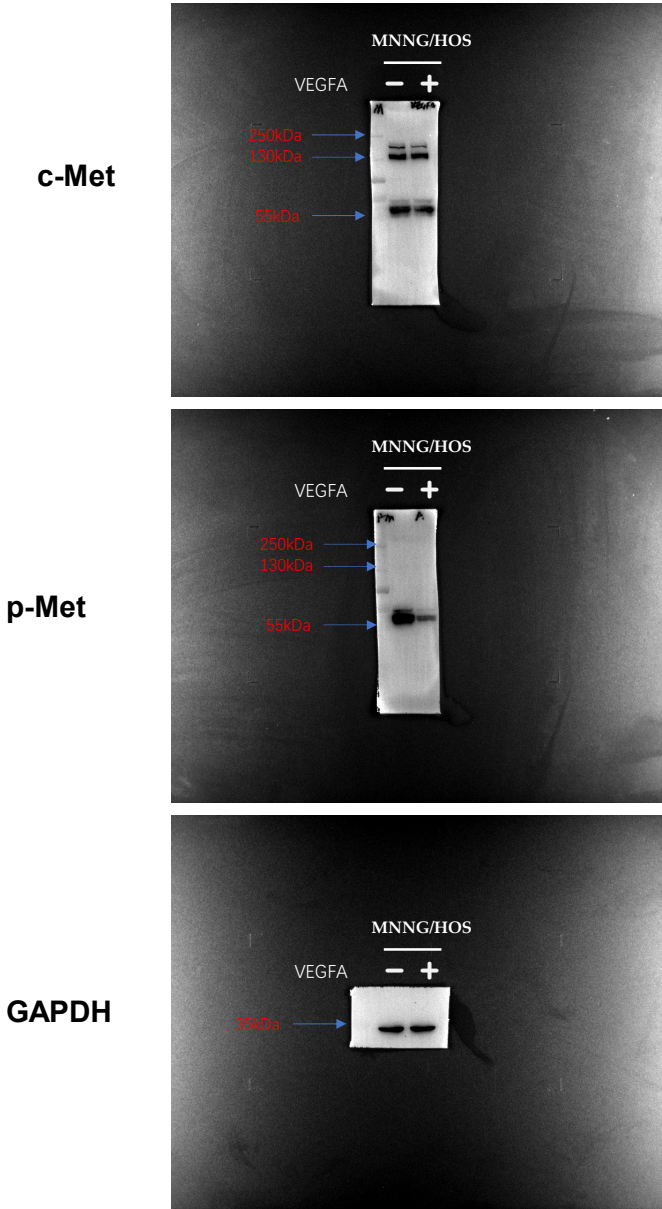

Figure 5 (h)

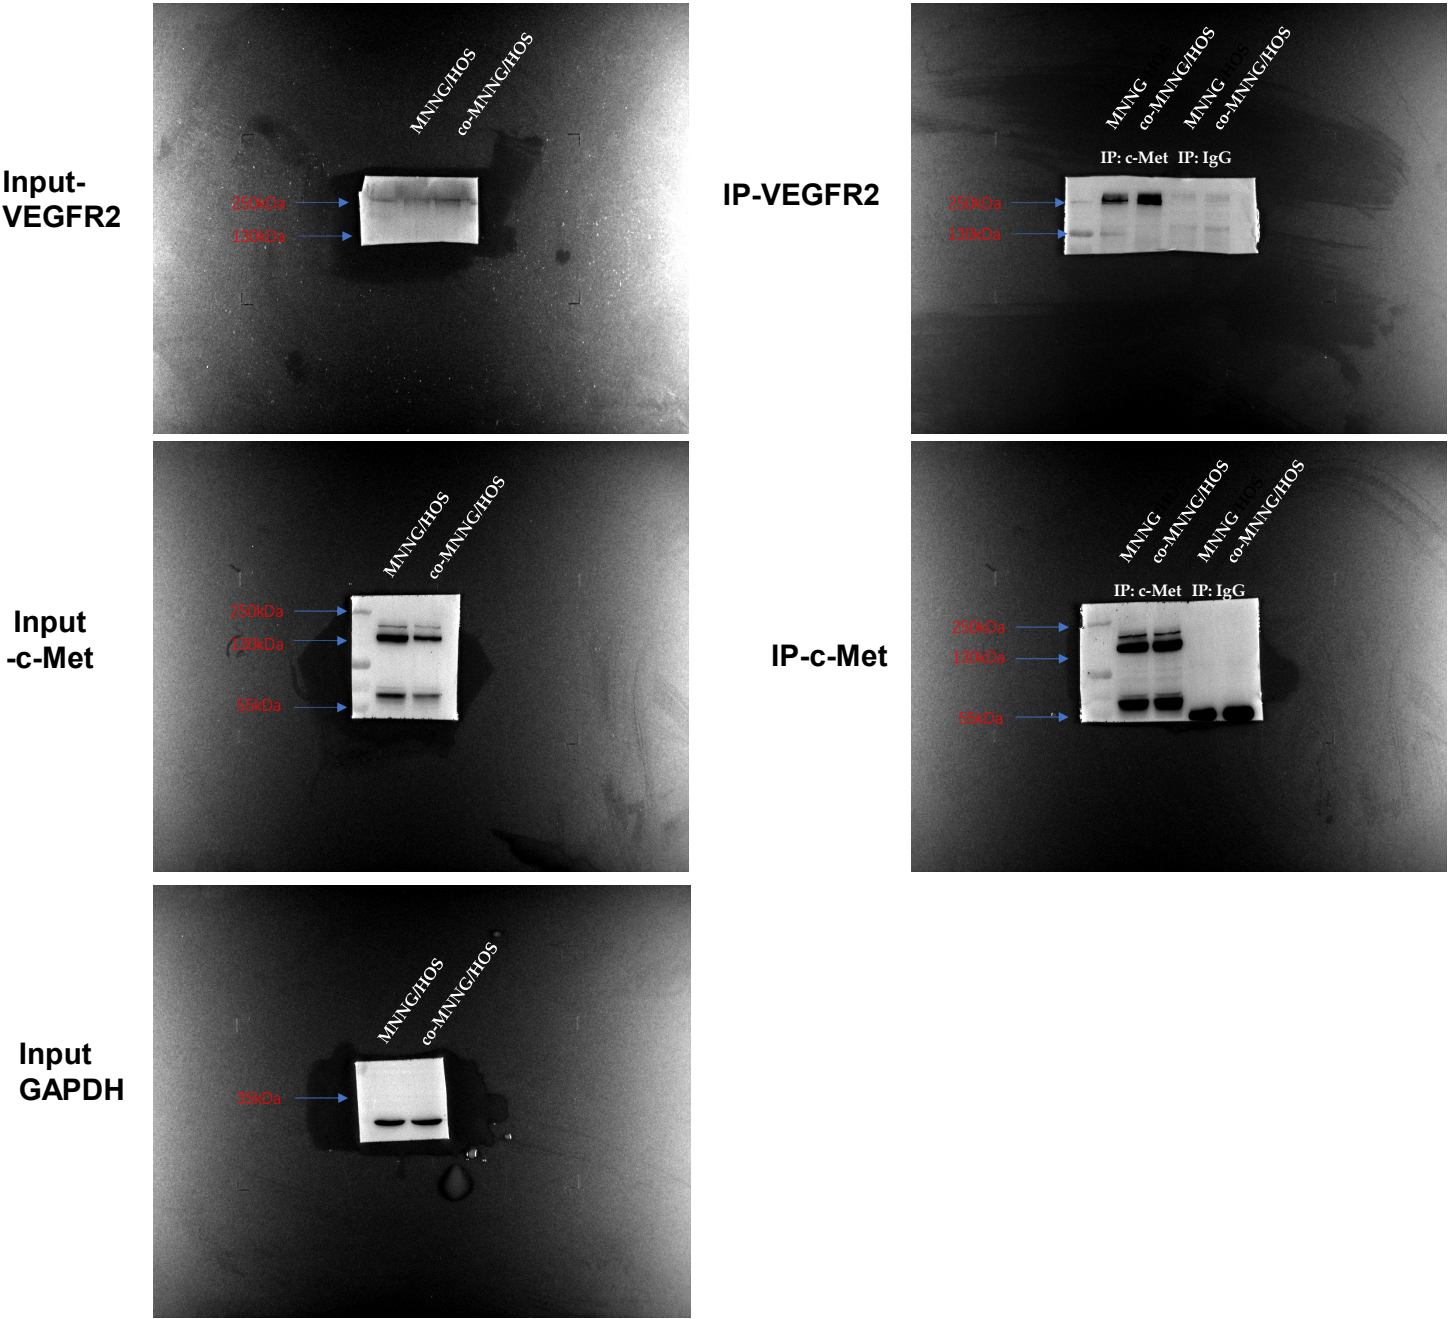

Figure 6 (b)

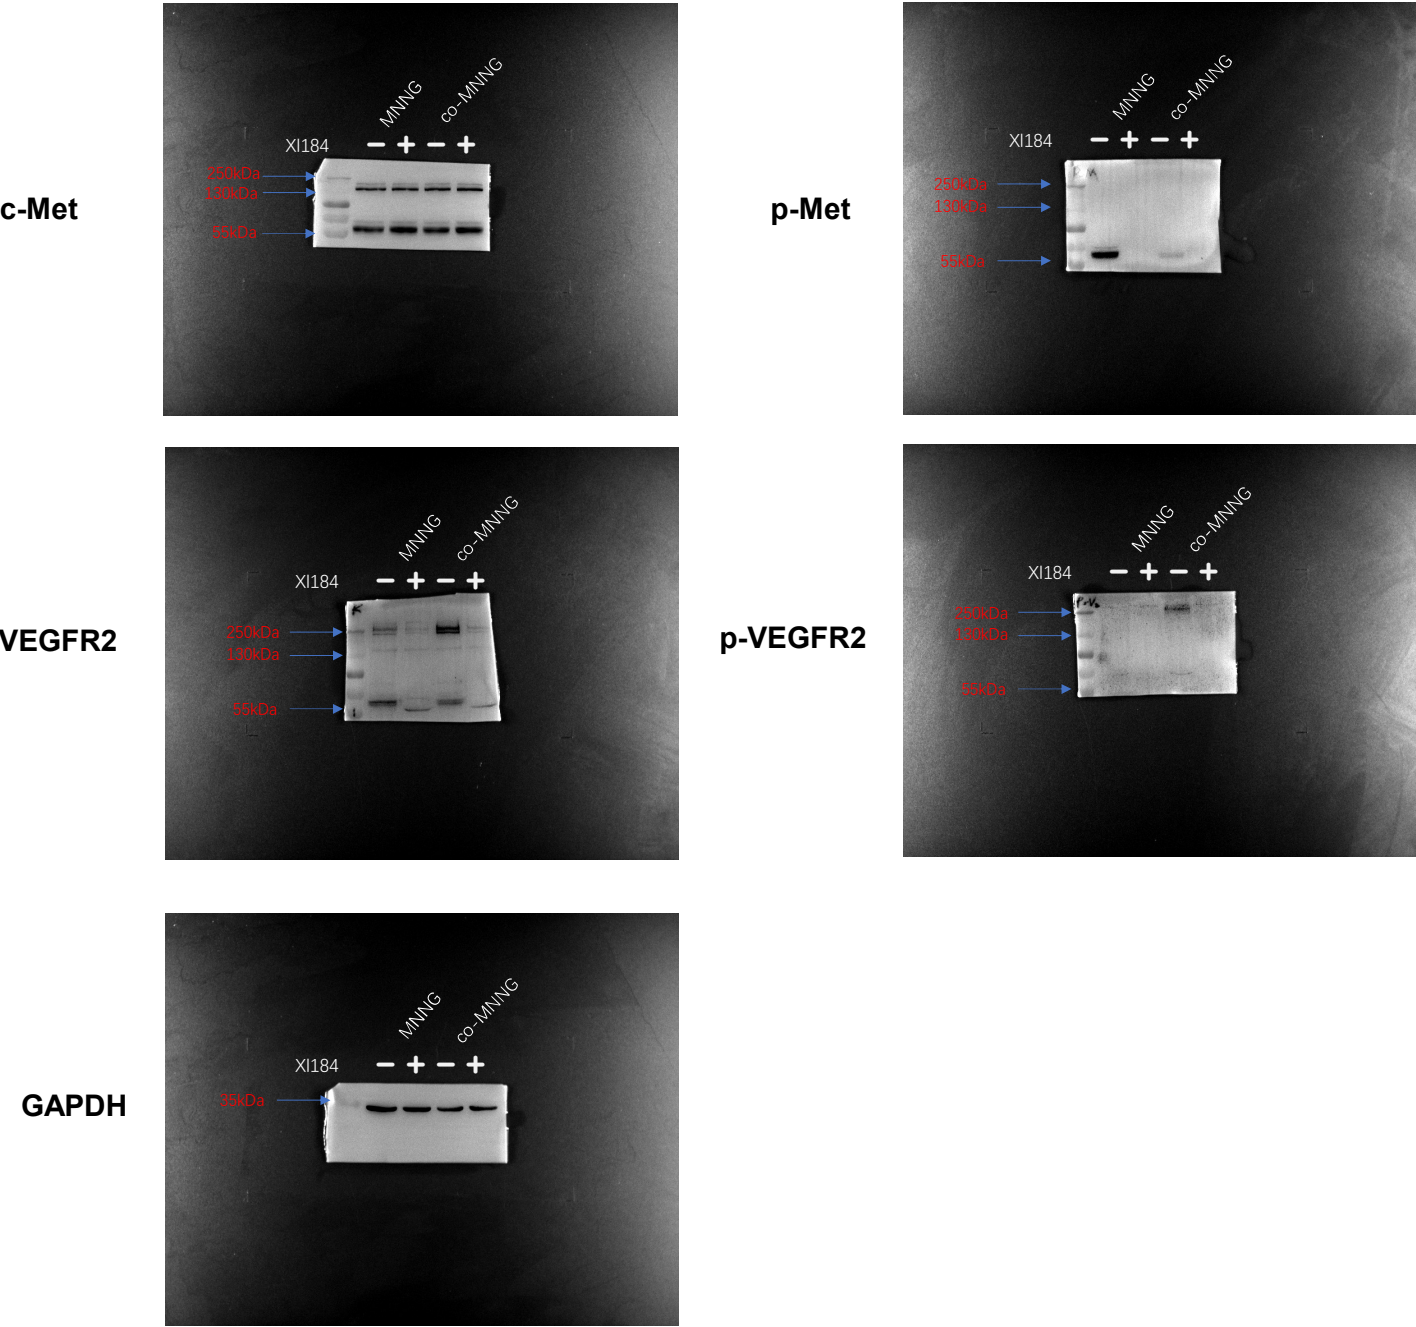

Supplement: s1 [file s1]
